# Supplementary material
Source: publisher figshare collection journal article supplement (https://brill.figshare.com/articles/dataset/_/12200423)
Supplement: Supplementary file 1 [file 1]

# **Glass Beads from Medieval Gao (Mali): New Analytical Data on Chronology, Sources, and Trade**

*Susan Keech McIntosh*

Department of Anthropology, Rice University, 6100 Main St., Houston, TX 77005-1827,  
USA

*skmci@rice.edu*

*Marilee Wood*

School of Geography, Archaeology and Environmental Studies, University of the  
Witwatersrand, Private Bag 3, P.O. Wits, 2050, South Africa

*Laure Dussubieux*

Elemental Analysis Facility, Field Museum, 1400 S. Lake Shore Drive, Chicago,  
IL 60605, USA

*Peter Robertshaw*

Department of Anthropology, California State University, San Bernardino, CA 92407,  
USA

*Timothy Insoll*

Institute of Arab and Islamic Studies, Exeter University, Stocker Road, Exeter EX4 4ND,  
UK

*Mamadou Cissé*

Mission Culturelle de Kangaba, Direction du Patrimoine Culturel, Mali

### **Supplementary Material**
